# Supplementary material for: Integration of pre-exposure prophylaxis services into public HIV care clinics in Kenya: a pragmatic stepped-wedge randomised trial
Source: PubMed Central journal article supplement — Lancet Glob Health. 2021 Nov 16;9(12):e1730–9. doi: 10.1016/S2214-109X(21)00391-0 (PMC8609282; doi:10.1016/s2214-109x(21)00391-0), 2021-11-16
Supplement: mmc1.pdf [file mmc1.pdf]

# THE LANCET

## Global Health

### Supplementary appendix

This appendix formed part of the original submission and has been peer reviewed. We post it as supplied by the authors.

Supplement to: Irungu EM, Mugwanya KK, Mugo NR, et al. Integration of pre-exposure prophylaxis services into public HIV care clinics in Kenya: a pragmatic stepped-wedge randomised trial. *Lancet Glob Health* 2021; **9**: e1730–39.

## SUPPLEMENTARY APPENDIX

### TABLE OF CONTENTS

|                                                                                                                               |           |
|-------------------------------------------------------------------------------------------------------------------------------|-----------|
| <b>PARTNERS SCALE UP PROJECT STUDY TEAM</b>                                                                                   | <b>2</b>  |
| <b>TABLE A1: CONSORT CHECKLIST OF INFORMATION TO INCLUDE WHEN REPORTING A STEPPED WEDGE CLUSTER RANDOMISED TRIAL (SW-CRT)</b> | <b>3</b>  |
| <b>TABLE A2: CONSORT CHECKLIST OF ITEMS TO INCLUDE WHEN REPORTING A RANDOMIZED TRIAL IN A JOURNAL OR CONFERENCE ABSTRACT</b>  | <b>6</b>  |
| <b>TABLE A3: DELTA RECOMMENDED REPORTING ITEMS FOR SAMPLE SIZE CALCULATION</b>                                                | <b>7</b>  |
| <b>TABLE A4: CLUSTER LEVEL SUMMARY STATISTICS</b>                                                                             | <b>9</b>  |
| <b>TABLE A5: TABLE OF ADVERSE EVENTS</b>                                                                                      | <b>10</b> |
| <b>FIGURE A1: MAP OF PARTICIPATING COUNTIES IN KENYA</b>                                                                      | <b>11</b> |
| <b>FIGURE A2: CUMULATIVE NUMBER OF PREP INITIATIONS</b>                                                                       | <b>12</b> |
| <b>FIGURE A3: PREP UPTAKE OVER TIME, PER CLINIC</b>                                                                           | <b>13</b> |
| <b>ANALYSIS PLAN FOR THE PREP COMPONENT OF AIM 1 OF PARTNERS SCALE-UP PROJECT</b>                                             | <b>14</b> |
| <b>DMC CHARTER</b>                                                                                                            | <b>17</b> |
| <b>CLINICAL ENCOUNTER FORM</b>                                                                                                | <b>20</b> |

## **PARTNERS SCALE UP PROJECT STUDY TEAM**

**Coordinating Center (University of Washington):** Jared M. Baeten (principal investigator), Kenneth Mugwanya (project director), Gena Barnabee, Lara Kidoguchi, Jennifer Morton, Gabrielle O'Malley, Sue Peacock, Kathryne Peebles, Stephanie Roche, Jennifer Velloza

### ***Study sites***

**Kisumu, Kenya:** Elizabeth Bukusi (principal investigator), Josephine Odoyo (project coordinator), Benjamin Angasa, Magdaline Asewe, Mercelline Awuor, Annabell Dollah, Lydia Etyang, Elizabeth Koyo, Benn Kwach, Sylvia Mugalla, Wycliffe Nelson, Bernard Nyerere, Alfred Obiero, Kenneth Odhiambo, Joel Odondi, Boblief Otieno, Laury Owanga, Meresa Oyier, John Bosco Tsetso

**Thika, Kenya:** Nelly Mugo (principal investigator), Elizabeth Irungu (country director), Elizabeth Wamoni (project coordinator), Nelson Kamau, Boaz Kipkorir, Victoria Kyengo, Peter Michira, Peter Mogere, Harrison Muigai, Peterson Mwaniki, Euticus Mwangi, Margaret Mwangi, Njoroge Mwathi, Rosemary Ngacha, Kenneth Ngure, Roy Njiru, Dickson Okello, Fernandos Ongolly, Emma Owidi, Cyrus Theuri, Winnie Waituika, Irene Wambui

**TABLE A1: CONSORT CHECKLIST OF INFORMATION TO INCLUDE WHEN REPORTING A STEPPED WEDGE CLUSTER RANDOMISED TRIAL (SW-CRT)**

| Topic                            | Item no | Checklist item                                                                                                                                                                                                                                                                                                       | Page no   |
|----------------------------------|---------|----------------------------------------------------------------------------------------------------------------------------------------------------------------------------------------------------------------------------------------------------------------------------------------------------------------------|-----------|
| <b>Title and Abstract</b>        |         |                                                                                                                                                                                                                                                                                                                      |           |
|                                  | 1a      | Identification as a SW-CRT in the title.                                                                                                                                                                                                                                                                             | 1         |
|                                  | 1b      | Structured summary of trial design, methods, results, and conclusions (see separate SW-CRT checklist for abstracts).                                                                                                                                                                                                 | 2         |
| <b>Introduction</b>              |         |                                                                                                                                                                                                                                                                                                                      |           |
| Background and objectives        | 2a      | Scientific background. Rationale for using a cluster design and rationale for using a stepped wedge design.                                                                                                                                                                                                          | 6         |
|                                  | 2b      | Specific objectives or hypotheses.                                                                                                                                                                                                                                                                                   | 5         |
| <b>Methods</b>                   |         |                                                                                                                                                                                                                                                                                                                      |           |
| Trial design                     | 3a      | Description and diagram of trial design including definition of cluster, number of sequences, number of clusters randomised to each sequence, number of periods, duration of time between each step, and whether the participants assessed in different periods are the same people, different people, or a mixture. | 6 & Fig 2 |
|                                  | 3b      | Important changes to methods after trial commencement (such as eligibility criteria), with reasons.                                                                                                                                                                                                                  | NA        |
| Participants                     | 4a      | Eligibility criteria for clusters and participants                                                                                                                                                                                                                                                                   | 6,8       |
|                                  | 4b      | Settings and locations where the data were collected                                                                                                                                                                                                                                                                 | 6, S11    |
| Interventions                    | 5       | The intervention and control conditions with sufficient details to allow replication, including whether the intervention was maintained or repeated, and whether it was delivered at the cluster level, the individual participant level, or both.                                                                   | 7         |
| Outcomes                         | 6a      | Completely defined prespecified primary and secondary outcome measures, including how and when they were assessed.                                                                                                                                                                                                   | 9-10      |
|                                  | 6b      | Any changes to trial outcomes after the trial commenced, with reasons.                                                                                                                                                                                                                                               | NA        |
| Sample size                      | 7a      | How sample size was determined. Method of calculation and relevant parameters with sufficient detail so the calculation can be replicated. Assumptions made about correlations between outcomes of participants from the same cluster. (see separate checklist for SW-CRT sample size items).                        | 9         |
|                                  | 7b      | When applicable, explanation of any interim analyses and stopping guidelines.                                                                                                                                                                                                                                        | NA        |
| <b>Randomization</b>             |         |                                                                                                                                                                                                                                                                                                                      |           |
| Sequence generation              | 8a      | Method used to generate the random allocation to the sequences of treatment                                                                                                                                                                                                                                          | 8         |
|                                  | 8b      | Type of randomisation; details of any constrained randomisation or stratification, if used.                                                                                                                                                                                                                          | 8         |
| Allocation concealment mechanism | 9       | Specification that allocation was based on clusters; description of any methods used to conceal the allocation from the clusters until after                                                                                                                                                                         | 8         |



|                                                      |     |                                                                                                                                                                                                                                                                                           |                        |
|------------------------------------------------------|-----|-------------------------------------------------------------------------------------------------------------------------------------------------------------------------------------------------------------------------------------------------------------------------------------------|------------------------|
|                                                      |     | recruitment.                                                                                                                                                                                                                                                                              |                        |
| Implementation                                       | 10a | Who generated the randomisation schedule, who enrolled clusters, and who assigned clusters to sequences.                                                                                                                                                                                  | 8                      |
|                                                      | 10b | Mechanism by which individual participants were included in clusters for the purposes of the trial (such as complete enumeration, random sampling; continuous recruitment or ascertainment; or recruitment at a fixed point in time), including who recruited or identified participants. | 9                      |
|                                                      | 10c | Whether, from whom and when consent was sought and for what; whether this differed between treatment conditions                                                                                                                                                                           | 11                     |
| Blinding                                             | 11a | If done, who was blinded after assignment to sequences (e.g., cluster level participants, individual level participants, those assessing outcomes) and how.                                                                                                                               | 8                      |
|                                                      | 11b | If relevant, description of the similarity of treatments                                                                                                                                                                                                                                  | NA                     |
| Statistical Methods                                  | 12a | Statistical methods used to compare treatment conditions for primary and secondary outcomes including how time effects, clustering and repeated measures were taken into account.                                                                                                         | 9-10                   |
|                                                      | 12b | Methods for additional analyses, such as subgroup analyses, sensitivity analyses, and adjusted analyses                                                                                                                                                                                   | 10-11                  |
| <b>Results</b>                                       |     |                                                                                                                                                                                                                                                                                           |                        |
| Participant flow (a diagram is strongly recommended) | 13a | For each treatment condition or allocated sequence, the numbers of clusters and participants who were assessed for eligibility, were randomly assigned, received intended treatments, and were analyzed for the primary outcome                                                           | Fig 2                  |
|                                                      | 13b | For each treatment condition or allocated sequence, losses and exclusions for both clusters and participants with reasons.                                                                                                                                                                | Fig 2                  |
| Recruitment                                          | 14a | Dates defining the steps, initiation of intervention, and deviations from planned dates. Dates defining recruitment and follow-up for participants.                                                                                                                                       | Fig 1                  |
|                                                      | 14b | Why the trial ended or was stopped                                                                                                                                                                                                                                                        | 6                      |
| Baseline data                                        | 15  | Baseline characteristics for the individual and cluster levels as applicable for each treatment condition or allocated sequence                                                                                                                                                           | 12, Table 2 & Table A4 |
| Numbers analyzed                                     | 16  | The number of observations and clusters included in each analysis for each treatment condition and whether the analysis was according to the allocated schedule                                                                                                                           | 12                     |
| Outcomes & Estimation                                | 17a | For each primary and secondary outcome, results for each treatment condition, and the estimated effect size and its precision (such as 95% confidence interval); any correlations (or covariances) and time effects estimated in the analysis.                                            | 12-14                  |
|                                                      | 17b | For binary outcomes, presentation of both absolute and relative effect sizes is recommended                                                                                                                                                                                               | 12                     |
| Ancillary analysis                                   | 18  | Results of any other analyses performed, including subgroup analyses and adjusted analyses, distinguishing prespecified from exploratory.                                                                                                                                                 | 13                     |

|                          |    |                                                                                                                                                                                          |          |
|--------------------------|----|------------------------------------------------------------------------------------------------------------------------------------------------------------------------------------------|----------|
| Harms                    | 19 | Important harms or unintended effects in each treatment condition (for specific guidance see CONSORT for harms).                                                                         | Table A5 |
| <b>Discussion</b>        |    |                                                                                                                                                                                          |          |
| Limitations              | 20 | Trial limitations, addressing sources of potential bias, imprecision, and, if relevant, multiplicity of analyses                                                                         | 16       |
| Generalizability         | 21 | Generalizability (external validity, applicability) of the trial findings. Generalizability to clusters or individual participants, or both (as relevant).                               | 16       |
| Interpretation           | 22 | Interpretation consistent with results, balancing benefits and harms, and considering other relevant evidence.                                                                           | 14-15    |
| <b>Other information</b> |    |                                                                                                                                                                                          |          |
| Registration             | 23 | Registration number and name of trial registry                                                                                                                                           | 6        |
| Protocol                 | 24 | Where the full trial protocol can be accessed, if available.                                                                                                                             | 16       |
| Funding                  | 25 | Sources of funding and other support (such as supply of drugs), and the role of funders.                                                                                                 | 11       |
| Research Ethics          | 26 | Whether the study was approved by a research ethics committee, identification of the review committee(s). Justification for any waiver or modification of informed consent requirements. | 11       |

**TABLE A2: CONSORT CHECKLIST OF ITEMS TO INCLUDE WHEN REPORTING A RANDOMIZED TRIAL IN A JOURNAL OR CONFERENCE ABSTRACT**

| <b>Item</b>               | <b>Description</b>                                                                                          | <b>Reported on line number</b> |
|---------------------------|-------------------------------------------------------------------------------------------------------------|--------------------------------|
| <b>Title</b>              | Identification of the study as randomized                                                                   | Line 2 of the title            |
| <b>Authors *</b>          | Contact details for the corresponding author                                                                | N/A                            |
| <b>Trial design</b>       | Description of the trial design (e.g., parallel, cluster, non-inferiority)                                  | Line 2 of the title & Line 7   |
| <b>Methods</b>            |                                                                                                             |                                |
| <b>Participants</b>       | Eligibility criteria for participants and the settings where the data were collected                        | 8,11                           |
| <b>Interventions</b>      | Interventions intended for each group                                                                       | 9,10                           |
| <b>Objective</b>          | Specific objective or hypothesis                                                                            | 8                              |
| <b>Outcome</b>            | Clearly defined primary outcome for this report                                                             | 12                             |
| <b>Randomization</b>      | How participants were allocated to interventions                                                            | 9                              |
| <b>Blinding (masking)</b> | Whether or not participants, care givers, and those assessing the outcomes were blinded to group assignment | 12                             |
| <b>Results</b>            |                                                                                                             |                                |
| <b>Numbers randomized</b> | Number of participants randomized to each group                                                             | 17                             |
| <b>Recruitment</b>        | Trial status                                                                                                | 17                             |
| <b>Numbers analyzed</b>   | Number of participants analyzed in each group                                                               | 17                             |
| <b>Outcome</b>            | For the primary outcome, a result for each group and the estimated effect size and its precision            | 19,20                          |
| <b>Harms</b>              | Important adverse events or side effects                                                                    | -                              |
| <b>Conclusions</b>        | General interpretation of the results                                                                       | 29-31                          |
| <b>Trial registration</b> | Registration number and name of trial register                                                              | 35                             |
| <b>Funding</b>            | Source of funding                                                                                           | 34                             |

*\*this item is specific to conference abstracts*

**TABLE A3: DELTA RECOMMENDED REPORTING ITEMS FOR SAMPLE SIZE CALCULATION**

| Recommended reporting items                                                                                                                                                                                                                                                                                                                                                                                                                             | Page and line numbers where item is reported                |
|---------------------------------------------------------------------------------------------------------------------------------------------------------------------------------------------------------------------------------------------------------------------------------------------------------------------------------------------------------------------------------------------------------------------------------------------------------|-------------------------------------------------------------|
| <b>Core items</b>                                                                                                                                                                                                                                                                                                                                                                                                                                       |                                                             |
| (1) Primary outcome (and any other outcome on which the calculation is based)                                                                                                                                                                                                                                                                                                                                                                           | Line 212                                                    |
| If a primary outcome is not used as the basis for the sample size calculation, state why                                                                                                                                                                                                                                                                                                                                                                |                                                             |
| (2) Statistical significance level and power                                                                                                                                                                                                                                                                                                                                                                                                            | Line 215                                                    |
| (3) Express the target difference according to outcome type                                                                                                                                                                                                                                                                                                                                                                                             | Line 215                                                    |
| (a) Binary—state the target difference as an absolute or relative effect (or both), along with the intervention and control group proportions. If both an absolute and a relative difference are provided, clarify if either takes primacy in terms of the sample size calculation                                                                                                                                                                      | Line 215                                                    |
| (b) Continuous—state the target mean difference on the natural scale, common standard deviation, and standardised effect size (mean difference divided by the standard deviation)                                                                                                                                                                                                                                                                       | NA                                                          |
| (c) Time-to-event—state the target difference as an absolute or relative difference (or both); provide the control group event proportion, planned length of follow-up, intervention and control group survival distributions, and accrual time (if assumptions regarding them are made). If both an absolute and relative difference are provided for a particular time point, clarify if either takes primacy in terms of the sample size calculation | NA                                                          |
| (4) Allocation ratio                                                                                                                                                                                                                                                                                                                                                                                                                                    |                                                             |
| If an unequal ratio is used, the reason for this should be stated                                                                                                                                                                                                                                                                                                                                                                                       | Study design in SW-CRT and no allocation ration was applied |
| (5) Sample size based on the assumptions as per above                                                                                                                                                                                                                                                                                                                                                                                                   | Line 214                                                    |
| (a) Reference the formula/sample size calculation approach, if standard binary, continuous, or survival outcome formulas are not used. For a time- to-event outcome, the number of events required should be stated                                                                                                                                                                                                                                     |                                                             |
| (b) If any adjustments (eg, allowance for loss to follow-up, multiple testing) that alter the required sample size are incorporated, they should also be specified, referenced, and justified along with the final sample size                                                                                                                                                                                                                          | NA                                                          |

|                                                                                                                                                                                                                                                                                                                                                                                                                                                                                                  |         |
|--------------------------------------------------------------------------------------------------------------------------------------------------------------------------------------------------------------------------------------------------------------------------------------------------------------------------------------------------------------------------------------------------------------------------------------------------------------------------------------------------|---------|
| (c) For alternative designs, additional input should be stated and justified. For example, for a cluster randomised controlled trial (or an individually randomised controlled trial with clustering), state the average cluster size and intracluster correlation coefficient(s). Variability in cluster size should be considered and, if necessary, the coefficient of variation should be incorporated into the sample size calculation. Justification for the values chosen should be given | 216-218 |
| (d) Provide details of any assessment of the sensitivity of the sample size to the inputs used                                                                                                                                                                                                                                                                                                                                                                                                   | None    |
| <b>Additional items for grant application and trial protocol</b>                                                                                                                                                                                                                                                                                                                                                                                                                                 |         |
| (6) Underlying basis used for specifying the target difference (an important or realistic difference)                                                                                                                                                                                                                                                                                                                                                                                            | NA      |
| (7) Explain the choice of target difference—specify and reference any formal method used or relevant previous research                                                                                                                                                                                                                                                                                                                                                                           | NA      |
| <b>Additional item for trial results paper</b>                                                                                                                                                                                                                                                                                                                                                                                                                                                   |         |
| (8) Reference the trial protocol                                                                                                                                                                                                                                                                                                                                                                                                                                                                 | Line 97 |

**TABLE A4: CLUSTER LEVEL SUMMARY STATISTICS**

PrEP initiations and Month 3 continuation, by clinic

|           | Number (% of total)<br>initiating PrEP | Number (% of<br>initiations) returning 3<br>months after PrEP<br>initiation |
|-----------|----------------------------------------|-----------------------------------------------------------------------------|
| Clinic 1  | 289 (5.9%)                             | 136 (47.1%)                                                                 |
| Clinic 2  | 139 (2.8%)                             | 72 (51.8%)                                                                  |
| Clinic 3  | 223 (4.6%)                             | 100 (44.8%)                                                                 |
| Clinic 4  | 278 (5.7%)                             | 100 (36.0%)                                                                 |
| Clinic 5  | 70 (1.4%)                              | 30 (42.9%)                                                                  |
| Clinic 6  | 126 (2.6%)                             | 65 (51.6%)                                                                  |
| Clinic 7  | 279 (5.7%)                             | 126 (45.2%)                                                                 |
| Clinic 8  | 152 (3.1%)                             | 71 (46.7%)                                                                  |
| Clinic 9  | 232 (4.7%)                             | 129 (55.6%)                                                                 |
| Clinic 10 | 280 (5.7%)                             | 132 (47.1%)                                                                 |
| Clinic 11 | 178 (3.6%)                             | 102 (57.3%)                                                                 |
| Clinic 12 | 230 (4.7%)                             | 119 (51.7%)                                                                 |
| Clinic 13 | 278 (5.7%)                             | 127 (45.7%)                                                                 |
| Clinic 14 | 114 (2.3%)                             | 44 (38.6%)                                                                  |
| Clinic 15 | 191 (3.9%)                             | 78 (40.8%)                                                                  |
| Clinic 16 | 164 (3.3%)                             | 74 (45.1%)                                                                  |
| Clinic 17 | 128 (2.6%)                             | 39 (30.5%)                                                                  |
| Clinic 18 | 305 (6.2%)                             | 114 (37.4%)                                                                 |
| Clinic 19 | 174 (3.6%)                             | 66 (37.9%)                                                                  |
| Clinic 20 | 87 (1.8%)                              | 34 (39.1%)                                                                  |
| Clinic 21 | 186 (3.8%)                             | 79 (42.5%)                                                                  |
| Clinic 22 | 306 (6.2%)                             | 104 (34.0%)                                                                 |
| Clinic 23 | 203 (4.1%)                             | 77 (37.9%)                                                                  |
| Clinic 24 | 136 (2.8%)                             | 45 (33.1%)                                                                  |
| Clinic 25 | 150 (3.1%)                             | 72 (48.0%)                                                                  |

**TABLE A5: TABLE OF ADVERSE EVENTS**

| <b>Adverse Event</b>                     | <b>N = 9117 follow up visits<br/>n(%)</b> |
|------------------------------------------|-------------------------------------------|
| Gastrointestinal related symptoms        | 12 (0.13%)                                |
| Elevated blood pressure                  | 6 (0.07%)                                 |
| Headache                                 | 6 (0.07%)                                 |
| Upper respiratory tract related symptoms | 4 (0.04%)                                 |
| Musculoskeletal related symptoms         | 4 (0.04%)                                 |
| Genital-urinary related symptoms         | 3 (0.03%)                                 |
| Other – weight-related, skin-related     | 4 (0.04%)                                 |
| <b>Total</b>                             | <b>39 (0.43%)</b>                         |

**FIGURE A1: MAP OF PARTICIPATING COUNTIES IN KENYA**

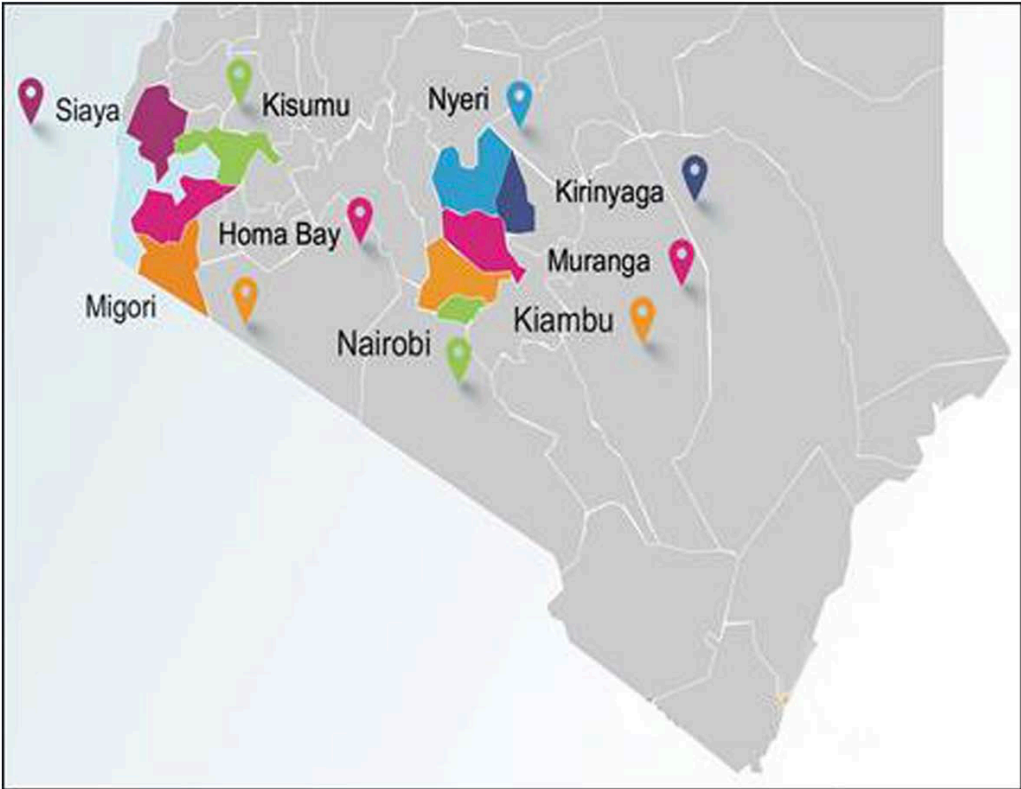



**FIGURE A2: CUMULATIVE NUMBER OF PREP INITIATIONS**

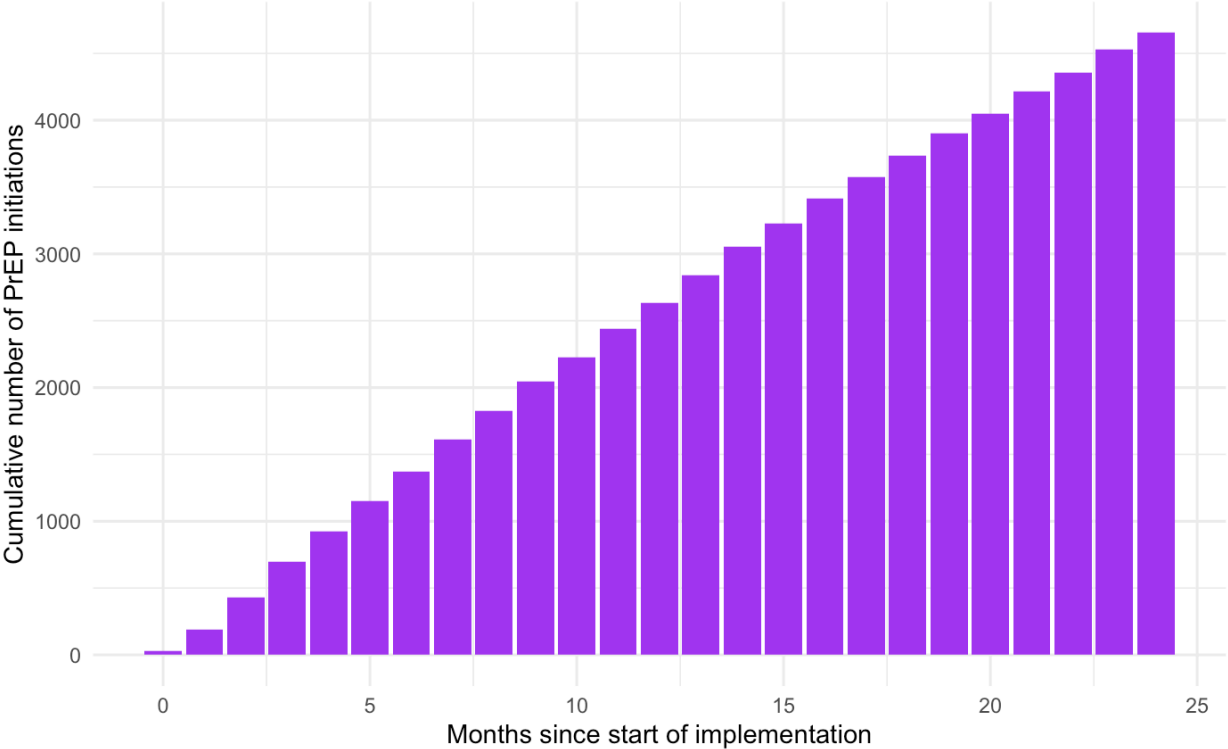

**FIGURE A3: PREP UPTAKE OVER TIME, PER CLINIC**

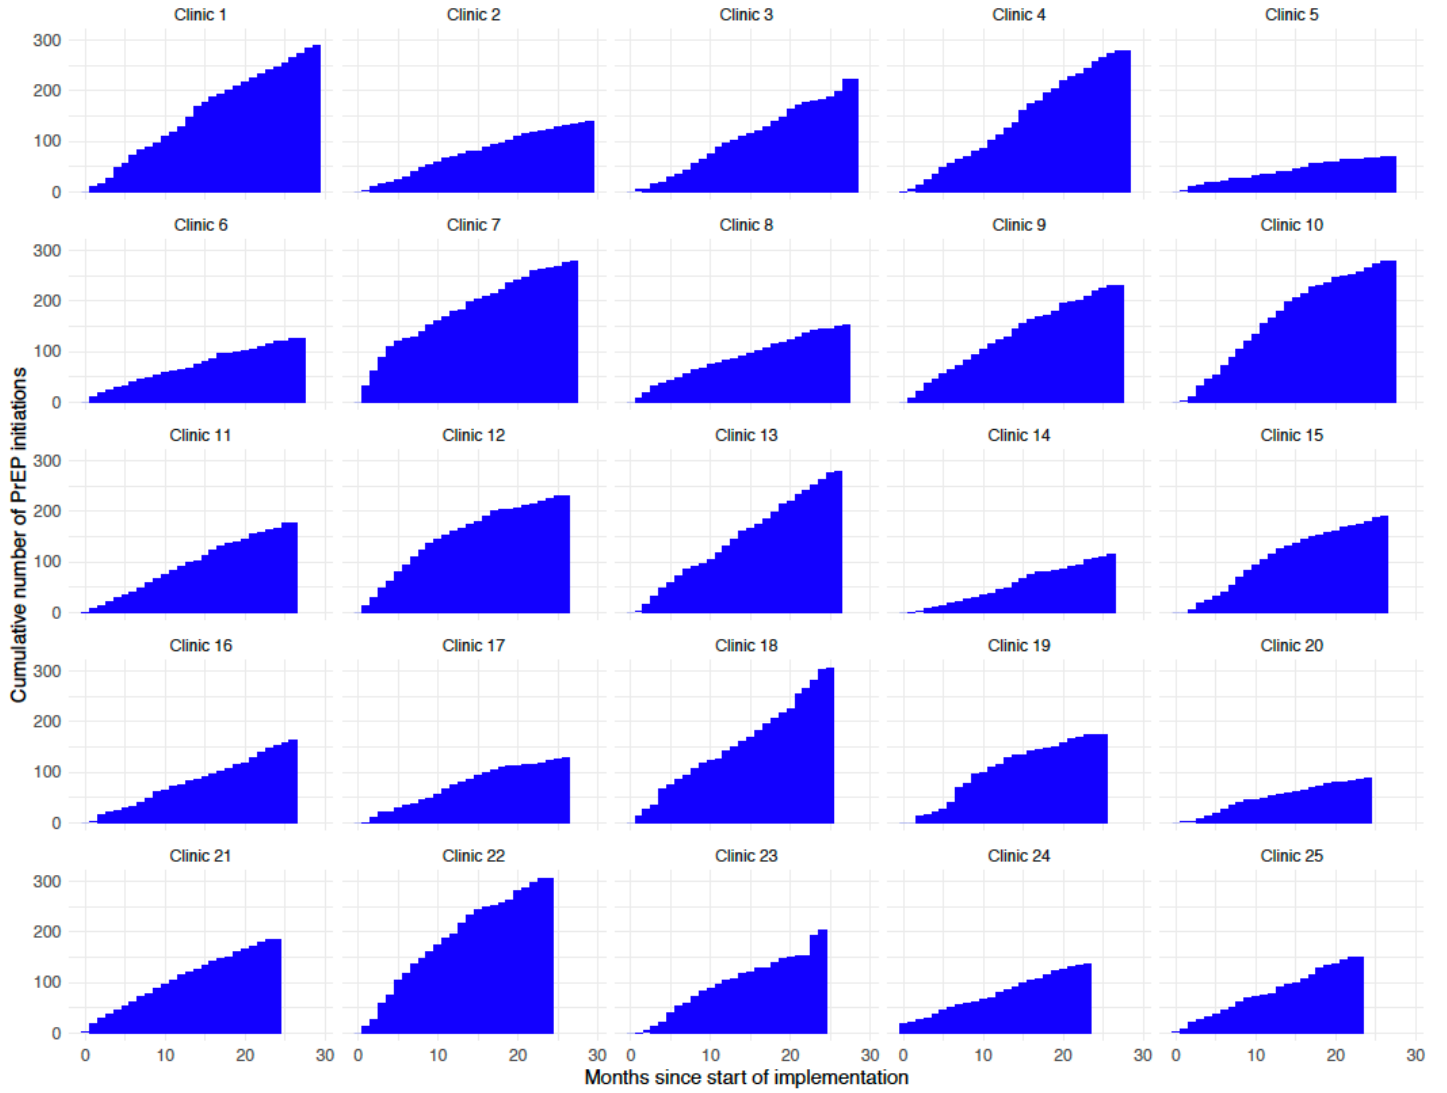

# ANALYSIS PLAN FOR THE PREP COMPONENT OF AIM 1 OF PARTNERS SCALE-UP PROJECT

## OVERALL AIM

To conduct an impact evaluation of the Partners Scale-Up Project, an implementation project to scale-up PrEP delivery among Kenyan HIV serodiscordant couples in public health facilities in Kenya – list the 4 key outcomes

## SPECIFIC AIMS

1. Determine number of people initiating PrEP per month in 24 public health HIV care clinics during the project period comparing active vs control periods, and describe characteristics of at-risk persons initiating PrEP
2. Describe the proportion of individuals continuing to use PrEP at i) 1 month ii) 3 months, iii) 6 months, and iv) 12 months, and determine correlates of continuation
3. Describe adherence to PrEP, by self-report and drug levels, among people returning for refills
4. Determine incident HIV infections and compare this with expected HIV incidence using a counterfactual simulation scenario
5. Determine proportion of visits in which core components of PrEP delivery, including HIV testing, acute HIV assessment, and PrEP dispensing are performed.

## STUDY DESIGN

This is a stepped-wedge cluster randomized design with 7 steps each containing 2-6 HIV care clinics (clusters). Twenty-four high volume HIV care clinics in central and western Kenya were randomized to the order in which they will receive intervention i.e., 2-day PrEP training for health providers and provision of technical assistance (see table below).

Training was carried out between Jan 2017 and July 2017. Upon completion of training and PrEP delivery components availed, facilities were activated to begin the intervention. Facilities that were activated in the last week of the month were assigned the following month as their activation month.

All clinics were in the maintenance phase from August 2017.

| Clinic | Start Date | Assigned Start Month | Jan, 2017 | Feb, 2017 | Mar, 2017 | Apr, 2017 | May, 2017 | Jun, 2017 | Jul, 2017 | Aug, 2017 | Sep, 2017 - Jun, 2019 |
|--------|------------|----------------------|-----------|-----------|-----------|-----------|-----------|-----------|-----------|-----------|-----------------------|
| 25     | 3-Aug-17   | Aug, 2017            | B         | C         | C         | C         | C         | C         | C         |           |                       |
| 24     | 3-Aug-17   | Aug, 2017            | C         | C         | C         | C         | C         | C         | C         |           |                       |
| 23     | 27-Jul-17  | Aug, 2017            | C         | C         | C         | C         | C         | C         |           |           |                       |
| 22     | 17-Jul-17  | Jul, 2017            | C         | C         | C         | C         | C         | C         |           |           |                       |
| 21     | 10-Jul-17  | Jul, 2017            | C         | C         | C         | C         | C         | C         |           |           |                       |
| 20     | 10-Jul-17  | Jul, 2017            | C         | C         | C         | C         | C         | C         |           |           |                       |
| 19     | 30-Jun-17  | Jul, 2017            | C         | C         | C         | C         | C         |           |           |           |                       |
| 18     | 14-Jun-17  | Jun, 2017            | C         | C         | C         | C         | C         |           |           |           |                       |
| 17     | 25-May-17  | Jun, 2017            | C         | C         | C         | C         |           |           |           |           |                       |
| 16     | 25-May-17  | Jun, 2017            | C         | C         | C         | C         |           |           |           |           |                       |
| 15     | 25-May-17  | Jun, 2017            | C         | C         | C         | C         |           |           |           |           |                       |
| 14     | 25-May-17  | Jun, 2017            | C         | C         | C         | C         |           |           |           |           |                       |
| 13     | 19-May-17  | May, 2017            | C         | C         | C         | C         |           |           |           |           |                       |
| 12     | 2-May-17   | May, 2017            | C         | C         | C         | C         |           |           |           |           |                       |
| 11     | 2-May-17   | May, 2017            | C         | C         | C         | C         |           |           |           |           |                       |
| 10     | 18-Apr-17  | Apr, 2017            | C         | C         | C         |           |           |           |           |           |                       |
| 9      | 4-Apr-17   | Apr, 2017            | C         | C         | C         |           |           |           |           |           |                       |
| 8      | 4-Apr-17   | Apr, 2017            | C         | C         | C         |           |           |           |           |           |                       |
| 7      | 4-Apr-17   | Apr, 2017            | C         | C         | C         |           |           |           |           |           |                       |
| 6      | 4-Apr-17   | Apr, 2017            | C         | C         | C         |           |           |           |           |           |                       |
| 5      | 4-Apr-17   | Apr, 2017            | C         | C         | C         |           |           |           |           |           |                       |
| 4      | 3-Mar-17   | Mar, 2017            | C         | C         |           |           |           |           |           |           |                       |
| 3      | 3-Mar-17   | Mar, 2017            | C         | C         |           |           |           |           |           |           |                       |
| 2      | 7-Feb-17   | Feb, 2017            | C         |           |           |           |           |           |           |           |                       |
| 1      | 7-Feb-17   | Feb, 2017            | C         |           |           |           |           |           |           |           |                       |

## KEY OUTCOMES

- Number of people initiating PrEP per clinic per month
- Proportion of people continuing use at 1, 3, 6 and 12 months
- Proportion of those returning for refills with detectable drug levels
- HIV incidence
- Proportion of visits in which core components are performed.

## OVERVIEW OF STATISTICAL ANALYSIS

**Aim 1:** Determine number of people initiating PrEP per month in 24 public health HIV care clinics during the project period comparing active to control periods, and describe characteristics of at-risk persons initiating PrEP.

1. Descriptive statistics of participant characteristics at PrEP initiation to be reported as Table 1 and summarized as text
2. Change in number of people initiating PrEP per month during intervention phase compared to number of people initiating PrEP per month during the control phase
  - i. Immediate level change
  - ii. Slope change (change in monthly trend of PrEP initiations) after implementation

Analysis approach:

- a. A cluster level mixed effects negative binomial model to estimate intervention effect on number initiating PrEP with
  - fixed effects for intervention (vs control period), step, clinic volume and region
  - random effect for each clinic
- b. A cluster level mixed effects negative binomial model to determine change in monthly PrEP interventions over time after implementation of intervention
  - fixed effects for duration since start of PrEP implementation in years, region, clinic volume and calendar time
  - random effect for each clinic

**Aim 2:** Describe the proportion of individuals continuing to use PrEP for i) 1 month, ii) 3 months, iii) 6 months, and iv) 12 months and determine correlates of continuation

1. Descriptive statistics of continuation rates at each of the above time points will be summarized in the text
2. An alluvial plot showing continuation and restarts
3. Descriptive statistics of PrEP users with at least one refill visit within the first three months of PrEP initiation and logistic regression methods to identify predictors of having at least one refill visit within the first three months of PrEP initiation

**Aim 3:** Describe adherence to PrEP, by self-report and drug levels, among people returning for refills

1. Describe the proportion of persons returning for PrEP self-reporting good adherence
2. Proportion of persons returning for PrEP refills with any detectable tenofovir levels

3. Present mean intracellular tenofovir-diphosphate (TFV-DP) concentrations from DBS obtained from people returning for PrEP refills from randomly selected clinics on a random subset of days each month.

**Aim 4:** Provide data on incident HIV infection and compare it with expected HIV incidence using a counterfactual simulation scenario

1. Describe number of incident HIV infections. Detail days since PrEP initiation when the infection was identified.
2. Compare expected HIV incidence with observed incidence using a counterfactual simulation scenario

Analysis approach

- Draw counterfactual population from placebo arm of the Partners PrEP study (N=1584 couples in the placebo arm). Each sample of <4800 couples will have a distribution of HIV risk scores and duration of follow-up to match the PSUP cohort (by frequency matching).
  - Divide HIV risk score into 2-3 categories (2-4, 5-7, >7). We will check the distribution of the risk score before choosing categories (median, mean, IQR, range)
- Mean number of HIV infections expected in the counterfactual population will be averaged over 10,000 bootstrap samples.
- Will compute an incidence rate ratio by comparing HIV incidence in PSUP to the mean counterfactual estimate

**Aim 5:** Determine proportion of visits in which core components of PrEP delivery, including HIV testing, acute HIV assessment, and PrEP dispensing are performed.

1. Present the proportion of initiation and quarterly follow up visits in which HIV testing, acute HIV assessment, creatinine testing and PrEP dispensing are performed. These will be described in the text and tabulated

#### DEFINITIONS OF KEY VARIABLES

- PrEP uptake – documentation of having received a PrEP prescription in facility records
- Continuation - the proportion of people expected to come for a visit who had a documented PrEP refill within the visit window.
- New HIV infection – person with a completed initial visit form and has a positive HIV test results after a previously documented HIV negative result

## **DMC CHARTER**

**Partners Scale-up Project**  
**Sponsor: University of Washington**  
**Funder: US National Institute of Mental Health (R01MH095507)**  
**ClinicalTrials.gov ID: NCT03052010**  
**PI: Jared Baeten, MD, MPH**

The Data Monitoring Committee (DMC) will act in an advisory capacity to the Partners Scale-up Project to evaluate the progress of the project. The Partners Scale-up Project in collaboration with the Kenya National AIDS and STI Control Programme (NASCOP), is conducting a national scale-up of PrEP delivery for HIV serodiscordant couples and other at-risk persons in 24-30+ comprehensive HIV care clinics in Central, Western and Coastal regions of Kenya.

### **DMC Responsibilities**

The DMC responsibilities are to:

- review the project implementation protocol and plans and how it fits into the national PrEP scale up program.
- evaluate the progress of the project, including periodic assessments of accrual and retention, PrEP user risks, performance and variation of the project sites, and other factors that can affect project implementation.
- consider factors external to the project when relevant information becomes available, such as policy changes or scientific developments that may have an impact on project implementation, safety, and integration of PrEP delivery in the HIV care clinics.
- review project performance, make recommendations and advice in the resolution of challenges reported by project investigators.

### **Completion of DMC Activities**

The DMC will remain active until written notification is received from project.

### **Membership**

The DMC will consist of six members and three members will constitute quorum. Membership consists of individuals who have no financial, scientific, or other conflict of interest and who have expertise in the fields of medicine, HIV prevention and treatment, policy, program implementation and epidemiology.

The members are:

- Dr. Irene Mukui - NASCOP
- Dr. Vernon Mochache - University of Maryland
- Dr. Jared Mecha – University of Nairobi
- Dr. Jeremy Penner - FACES
- Dr. Carol Ngunu - Nairobi CASCO
- Mr. Churchill Alumasa - DISCOK

### **Meeting Process**

The first meeting of the DMC will include an organizational meeting. This meeting will formally establish the DMC and begin to acquaint the DMC members with types of protocols that this DMC will be charged with monitoring. It will afford the DMC an opportunity to recommend final revisions to the Charter and the communication plan between the DMC and the project team. At the first meeting the DMC will discuss the

protocol and guidelines to project monitoring.

DMC meetings will be held approximately every 6 months. An ad hoc meeting of the DMC may be called at any time should unanticipated problems arise. Meetings will be convened as conference calls as well as in-person if needed. The project investigators will prepare the agenda to address the review of project progress, processes, modifications to the project protocol and project documents as needed.

### **Communications**

Communications will be by email and occasionally phone call to follow up on pending issues.

### **Process and Format of Meeting**

DMC meetings will consist of open sessions. Key members of the study team will attend the sessions and present information. Discussion will focus on the conduct and progress of the study, including participant accrual, retention and challenges encountered. The DMC may elect to hold an executive session in which generally only the DMC members are present in order to discuss project issues independently.

### **Meeting Materials**

DMC reports will be prepared by the project staff to be reviewed and discussed by the DMC members at each meeting. The format and content of the reports will be finalized and approved at the initial DMC meeting, and changes throughout the project may be requested by the committee.

The reports will describe and summarize the status of the project and any emerging implementation and safety data. The reports generally will include administrative reports that describe participants initiated, continuing on PrEP as well as baseline characteristics of the of PrEP initiators. Other general information on project status may also be presented. The DMC may ask additions and other modifications to the reports on a one-time or continuing basis.

### **Minutes of the DMC Meeting**

An appropriately detailed summary of the discussions of the DMC will be recorded by the project team, with any recommendations clearly documented at the end of each meeting. The minutes will be circulated to DMC members within 2 weeks of meeting. The DMC may choose to make a formal report containing the recommendations about progress or modifications of the study. Once approved by the DMC members, Principal Investigator will distribute the DMC recommendations to all co-investigators and ensure that copies are submitted to all the IRBs and other regulatory bodies associated with the project.

### **Confidentiality**

No personal identifying information will be discussed. While the discussions of the DMC are between the committee and the study investigators, materials and proceedings of the DMC may be shared with goal of informing and advancing PrEP delivery in Kenya.

### **Documentation and Archiving**

All documentation and communication of the DMC will be dated, filed, and archived by the project. The documents will be archived for the duration of project. Documents that will be filed and archived include, but are not limited to:

- DMC charter
- Curriculum vitae of all DMC members
- Agenda of the DMC meetings
- Minutes of the DMC meetings
- Copy of all materials sent by the DMC, including the project reports
- Recommendation(s) provided by the DMC to the project
- All official DMC correspondences.



# CLINICAL ENCOUNTER FORM

## Clinical Encounter Record: Oral Pre-Exposure Prophylaxis (PrEP)

Name of facility: \_\_\_\_\_ Delivery Point: \_\_\_\_\_ Tier: \_\_\_\_\_ MFL code: \_\_\_\_\_  
 County: \_\_\_\_\_ Sub county: \_\_\_\_\_ Ward: \_\_\_\_\_

### A. Client Profile

Unique client record number: \_\_\_\_\_ / \_\_\_\_\_ / \_\_\_\_\_ Initial visit date: dd / mm / yyyy

Name: First \_\_\_\_\_ Middle \_\_\_\_\_ Last \_\_\_\_\_ Telephone no: \_\_\_\_\_

Alien/National ID/passport/Birth Cert No: \_\_\_\_\_ NHIF No: \_\_\_\_\_ County of Birth \_\_\_\_\_

Sex:  Male  Female Date of birth: dd / mm / yyyy Age (years): \_\_\_\_\_ If age <19, attends school:  Yes  No

Marital status (select one):  Never married  Cohabiting  Married monogamous  Married polygamous  Separated/divorced  Widowed

Population Type:  Gen Population  Discordant couple  Key Population (Specify) \_\_\_\_\_  MSM  MSW  FSW  PWID

### B. Entry Point & Transfer Status

Referred from (select one):  
 HBTC  VCT site  OPD  MCH  TB clinic  IPD  CCC  
 Peer  Outreach  Self-referral  Community  Other: \_\_\_\_\_

If transferred in:  
 PrEP start date: dd / mm / yyyy Regimen:  TDF-FTC  TDF  TDF-3TC  
 Facility transferred from: \_\_\_\_\_ MFL code: \_\_\_\_\_ County: \_\_\_\_\_

### C. Baseline Assessment

#### Behaviour risk assessment

Mark all that apply:

Sex partner(s) is HIV+ and (mark all that apply):

- Not on ART
- On ART <6 months
- Suspected poor adherence to ART
- Detectable HIV viral load
- Couple is trying to conceive

(If yes to any) →

Sex partner(s) high risk & HIV status is unknown

- Has sex with >1 partner
- Ongoing IPV/GBV
- Transactional sex
- Recent STI (past 6 months)
- Recurrent use of post-exposure prophylaxis (PEP)
- Recurrent sex under influence of alcohol/recreational drugs
- Inconsistent or no condom use
- Injection drug use with shared needles and/or syringes

#### Complete section if sex partner is HIV+

HIV+ partner CCC number: \_\_\_\_\_ / \_\_\_\_\_  
 or  NA (not enrolled at a CCC)  
 or  CCC number/enrollment status unknown

HIV+ partner ART start date: dd / mm / yyyy  
 or  not on ART at initial visit

Time known to be HIV-serodiscordant: \_\_\_\_\_ years + \_\_\_\_\_ months

Sex without a condom with HIV+ partner in past 30 days:  Yes  No

Number of living children with HIV+ partner: \_\_\_\_\_

#### Medical assessment & fertility intentions

Blood pressure (mm Hg): \_\_\_\_\_ / \_\_\_\_\_ Temperature: \_\_\_\_\_ °C

Weight (kg): \_\_\_\_\_ Height (cm): \_\_\_\_\_

Signs/symptoms of STI:  Yes; Use codes provided: \_\_\_\_\_  No

| Chronic illnesses & comorbidities                                        | Treatment |
|--------------------------------------------------------------------------|-----------|
| Liver disease: <input type="checkbox"/> Yes <input type="checkbox"/> No  |           |
| Kidney disease: <input type="checkbox"/> Yes <input type="checkbox"/> No |           |
| 1. Other description                                                     |           |
| 2. Other description                                                     |           |

#### Male only:

Circumcised:  Yes  No  Unknown

#### Female only:

LMP: dd / mm / yyyy

Pregnant:  Yes  No

If pregnant:  Planned  Unplanned

Breastfeeding:  Yes  No

On family planning:  Yes  No FP methods: \_\_\_\_\_

Plan to have children (select one):  
 Trying to conceive  Future  No  Don't know

Clinical notes:

### D. PrEP initiation

Lab results (Investigations should not delay PrEP initiation. To be recorded when available.)

| Test                | Result                                                                                                | Additional steps                                                                                                                      |
|---------------------|-------------------------------------------------------------------------------------------------------|---------------------------------------------------------------------------------------------------------------------------------------|
| Hepatitis B (HBsAg) | <input type="checkbox"/> Positive <input type="checkbox"/> Negative <input type="checkbox"/> Not done | If negative, vaccine series initiated: <input type="checkbox"/> Yes <input type="checkbox"/> No Date sample collected: dd / mm / yyyy |
| Hepatitis C         | <input type="checkbox"/> Positive <input type="checkbox"/> Negative <input type="checkbox"/> Not done | Date sample collected: dd / mm / yyyy                                                                                                 |
| Serum creatinine    | _____ (µmol/L) or <input type="checkbox"/> Not done                                                   | If done, CrCl (mL/min): _____ If creatinine is out of range, or CrCl <50 mL/min, refer for further assessment.                        |

Previous PrEP use:  Yes  No

Willing to start PrEP:  Yes  No

If not willing, reason (mark all that apply):  None

Signs/symptoms of acute HIV:  Yes  No

Medically ineligible to start PrEP:  Yes  No

Contraindications for TDF-FTC / TDF-3TC/TDF:  Yes  No

Condom Issued:  Yes  No

Adherence Counseling Done:  Yes  No

Side effects (ADR)  Stigma  Pill burden  Taking pills for a long time  Too many HIV tests

No  No  No } Eligible for PrEP → Prescribed PrEP at initial visit:  Yes  No

Regimen:  TDF-FTC  TDF  TDF-3TC

# of months: \_\_\_\_\_ Date of initiation: dd / mm / yyyy

Next appointment date: dd / mm / yyyy

Clinician initials: \_\_\_\_\_

### Follow Up Visit

Unique client record number: \_\_\_\_\_ / \_\_\_\_\_ / \_\_\_\_\_ Name of client: \_\_\_\_\_

Visit date: *dd / mm / yyyy*  
 Visit type:  scheduled  unscheduled  
**E. Medical assessment & fertility intentions**

| Clinical notes                                                                         | Summary of findings                                                                                                                                                                                                                                                                                                                                                                                                                                                                                                                                                                                                                                                                                                                                                                                                                       |
|----------------------------------------------------------------------------------------|-------------------------------------------------------------------------------------------------------------------------------------------------------------------------------------------------------------------------------------------------------------------------------------------------------------------------------------------------------------------------------------------------------------------------------------------------------------------------------------------------------------------------------------------------------------------------------------------------------------------------------------------------------------------------------------------------------------------------------------------------------------------------------------------------------------------------------------------|
| _____<br>_____<br>_____<br>_____<br>_____<br>_____<br>_____<br>_____<br>_____<br>_____ | Blood pressure _____ / _____ mm Hg<br>Weight _____ kg Temperature _____ °C<br>Signs/symptoms of STI(s) <input type="checkbox"/> yes <input type="checkbox"/> no If yes Use codes provided _____<br>Signs/symptoms of acute HIV <input type="checkbox"/> yes <input type="checkbox"/> no<br>If male, circumcised since last visit <input type="checkbox"/> yes <input type="checkbox"/> no <input type="checkbox"/> na (already circumcised)                                                                                                                                                                                                                                                                                                                                                                                               |
|                                                                                        | Possible adverse drug reaction <input type="checkbox"/> none                                                                                                                                                                                                                                                                                                                                                                                                                                                                                                                                                                                                                                                                                                                                                                              |
|                                                                                        | Description _____<br>1 <input type="checkbox"/> mild <input type="checkbox"/> moderate <input type="checkbox"/> severe <input type="checkbox"/> life threatening <input type="checkbox"/> not graded<br>Action (mark all that apply) <input type="checkbox"/> stop <input type="checkbox"/> switched regimen <input type="checkbox"/> Other _____                                                                                                                                                                                                                                                                                                                                                                                                                                                                                         |
|                                                                                        | Description _____<br>2 <input type="checkbox"/> mild <input type="checkbox"/> moderate <input type="checkbox"/> severe <input type="checkbox"/> life threatening <input type="checkbox"/> not graded<br>Action (mark all that apply) <input type="checkbox"/> stop <input type="checkbox"/> switched regimen <input type="checkbox"/> Other _____                                                                                                                                                                                                                                                                                                                                                                                                                                                                                         |
|                                                                                        | Chronic illnesses & comorbidities Treatment<br>Liver disease <input type="checkbox"/> Yes <input type="checkbox"/> No<br>Kidney disease <input type="checkbox"/> Yes <input type="checkbox"/> No                                                                                                                                                                                                                                                                                                                                                                                                                                                                                                                                                                                                                                          |
|                                                                                        | 1 Other description _____<br>2 Other description _____                                                                                                                                                                                                                                                                                                                                                                                                                                                                                                                                                                                                                                                                                                                                                                                    |
|                                                                                        | Plan to have children <input type="checkbox"/> trying to conceive <input type="checkbox"/> future <input type="checkbox"/> no <input type="checkbox"/> don't know <input type="checkbox"/> client/partner is pregnant<br>If female LMP: _____ Pregnant <input type="checkbox"/> yes <input type="checkbox"/> no<br>Breastfeeding <input type="checkbox"/> yes <input type="checkbox"/> no<br>On family planning <input type="checkbox"/> none or methods (Indicate the code): _____<br>If ended pregnancy since last visit Outcome date <i>dd / mm / yyyy</i><br>Outcome <input type="checkbox"/> term live <input type="checkbox"/> preterm live <input type="checkbox"/> induced abortion <input type="checkbox"/> loss<br>Birth defect(s) <input type="checkbox"/> yes <input type="checkbox"/> no <input type="checkbox"/> don't know |

**F. Behaviour risk assessment**  
 Mark all that apply

|                                                                                                                                                                                                                                                                                                            |                                                                                                                                                                                                                                                                        |                                                                                                                                                                                                                                                              |
|------------------------------------------------------------------------------------------------------------------------------------------------------------------------------------------------------------------------------------------------------------------------------------------------------------|------------------------------------------------------------------------------------------------------------------------------------------------------------------------------------------------------------------------------------------------------------------------|--------------------------------------------------------------------------------------------------------------------------------------------------------------------------------------------------------------------------------------------------------------|
| <input type="checkbox"/> Sex partner(s) is HIV+ and:<br><input type="checkbox"/> not on ART<br><input type="checkbox"/> <6 months ART use<br><input type="checkbox"/> poor adherence to ART<br><input type="checkbox"/> detectable HIV viral load<br><input type="checkbox"/> couple is trying to conceive | <input type="checkbox"/> Sex partner(s) at high risk for HIV & HIV status unknown<br><input type="checkbox"/> Has sex with >1 partner<br><input type="checkbox"/> Ongoing IPV/GBV<br><input type="checkbox"/> Transactional sex<br><input type="checkbox"/> Recent STI | <input type="checkbox"/> Recurrent use of PEP<br><input type="checkbox"/> Recurrent sex under influence of alcohol/recreational drugs<br><input type="checkbox"/> Inconsistent or no condom use<br><input type="checkbox"/> IDU with shared needles/syringes |
|------------------------------------------------------------------------------------------------------------------------------------------------------------------------------------------------------------------------------------------------------------------------------------------------------------|------------------------------------------------------------------------------------------------------------------------------------------------------------------------------------------------------------------------------------------------------------------------|--------------------------------------------------------------------------------------------------------------------------------------------------------------------------------------------------------------------------------------------------------------|

**G. Follow up laboratory investigations**

|                                                                                                                |                                                                                                                                 |
|----------------------------------------------------------------------------------------------------------------|---------------------------------------------------------------------------------------------------------------------------------|
| HIV test <input type="checkbox"/> Positive <input type="checkbox"/> negative <input type="checkbox"/> not done | If positive, collect sample for drug resistance. Client linked to care <input type="checkbox"/> Yes <input type="checkbox"/> No |
| Serum creatinine (as per guidelines) _____ μmol/L or <input type="checkbox"/> not done                         | If creatinine is out of range, or CrCl <50 mL/min, refer for further assessment                                                 |
| If creatinine done, CrCl ≥50 mL/min <input type="checkbox"/> yes <input type="checkbox"/> no                   |                                                                                                                                 |
| Other (write in test, results & units [if applicable])                                                         | 1 _____<br>2 _____                                                                                                              |

**H. PrEP**

Self-assessment of adherence since last visit  Good  Fair  Bad  n/a (did not pick up PrEP at last visit)

If Fair/ bad, reason(s) (mark all that apply)  
 forgot  lost/out of pills  separated from HIV+ partner  no perceived risk  side effects  sick  
 stigma  pill burden  shared with others  none  other \_\_\_\_\_

Adherence Counseling done  yes  no **Condoms issued:**  yes  no

PrEP status  continue  restart  discontinue

Prescribed PrEP today  yes  no  
 TDF-FTC  TDF  TDF-3TC number of months \_\_\_\_\_

If yes, regimen and duration  
 If discontinued, reason(s) (mark all that apply)  
 HIV test is positive  low risk of HIV  renal dysfunction  client request  not adherent to PrEP  
 viral suppression of HIV+ partner  too many HIV tests  other \_\_\_\_\_

Next appointment date: *dd / mm / yyyy* Clinician initials: \_\_\_\_\_

|                                                                                                                                                                                                                                                                                                                                                                                                                                                                                             |                                                                                                                                                                                                                                                                                                                                                                                                                                                                                                                                                                                                          |                                                                                                                                                                                                                                                                                                                                                                                              |
|---------------------------------------------------------------------------------------------------------------------------------------------------------------------------------------------------------------------------------------------------------------------------------------------------------------------------------------------------------------------------------------------------------------------------------------------------------------------------------------------|----------------------------------------------------------------------------------------------------------------------------------------------------------------------------------------------------------------------------------------------------------------------------------------------------------------------------------------------------------------------------------------------------------------------------------------------------------------------------------------------------------------------------------------------------------------------------------------------------------|----------------------------------------------------------------------------------------------------------------------------------------------------------------------------------------------------------------------------------------------------------------------------------------------------------------------------------------------------------------------------------------------|
| <p><b>Adherence</b><br/>                 Good: missed 0-3 doses in past 1 month<br/>                 Fair: missed 4-5 doses in past 1 month<br/>                 Bad: missed 6-7 doses in past 1 month</p> <p><b>Creatinine clearance</b></p> <p>GFR (adult males) = <math>\frac{(140 - Ags) \times 1.23}{\text{serum creatinine (in micromol/L)}}</math></p> <p>GFR (adult females) = <math>\frac{(140 - Ags) \times 1.23}{\text{serum creatinine (in micromol/L)}} \times 0.85</math></p> | <p><b>FP Methods:</b><br/>                 C = Condoms<br/>                 TL = Tubal ligation/female sterilization<br/>                 FA = Fertility awareness method/periodic abstinence<br/>                 D = Diaphragm/cervical cap<br/>                 LAM = Lactational Amenorrhea Method<br/>                 IUD = Intra uterine device<br/>                 IMP = Implant<br/>                 INJ = Injectable<br/>                 OC = oral contraceptive pills<br/>                 ECP = Emergency contraceptive pills dispensed<br/>                 V = Vasectomy (partner's)</p> | <p><b>STI Diagnosis:</b><br/>                 Genital Ulcer Disease (GUD),<br/>                 Vaginitis and/or Vaginal Discharge (VG),<br/>                 Cervicitis and/or Cervical Discharge (CD),<br/>                 Pelvic Inflammatory Disease (PID),<br/>                 Urethral Discharge (UD),<br/>                 Anal Discharge (AD),<br/>                 Others (O)</p> |
|---------------------------------------------------------------------------------------------------------------------------------------------------------------------------------------------------------------------------------------------------------------------------------------------------------------------------------------------------------------------------------------------------------------------------------------------------------------------------------------------|----------------------------------------------------------------------------------------------------------------------------------------------------------------------------------------------------------------------------------------------------------------------------------------------------------------------------------------------------------------------------------------------------------------------------------------------------------------------------------------------------------------------------------------------------------------------------------------------------------|----------------------------------------------------------------------------------------------------------------------------------------------------------------------------------------------------------------------------------------------------------------------------------------------------------------------------------------------------------------------------------------------|
